# Supplementary material for: Secondary Metabolites Profiling, Antimicrobial and Cytotoxic Properties of Commiphora gileadensis L. Leaves, Seeds, Callus, and Cell Suspension Extracts
Source: MDPI journal article supplement (doi:10.3390/metabo13040537), 2023-04-10
Supplement: s1 [file s1]

## Supplementary Data

The following is the Total Ion Chromatogram (TIC) of the different extracts:

RT: 0.00 - 30.00

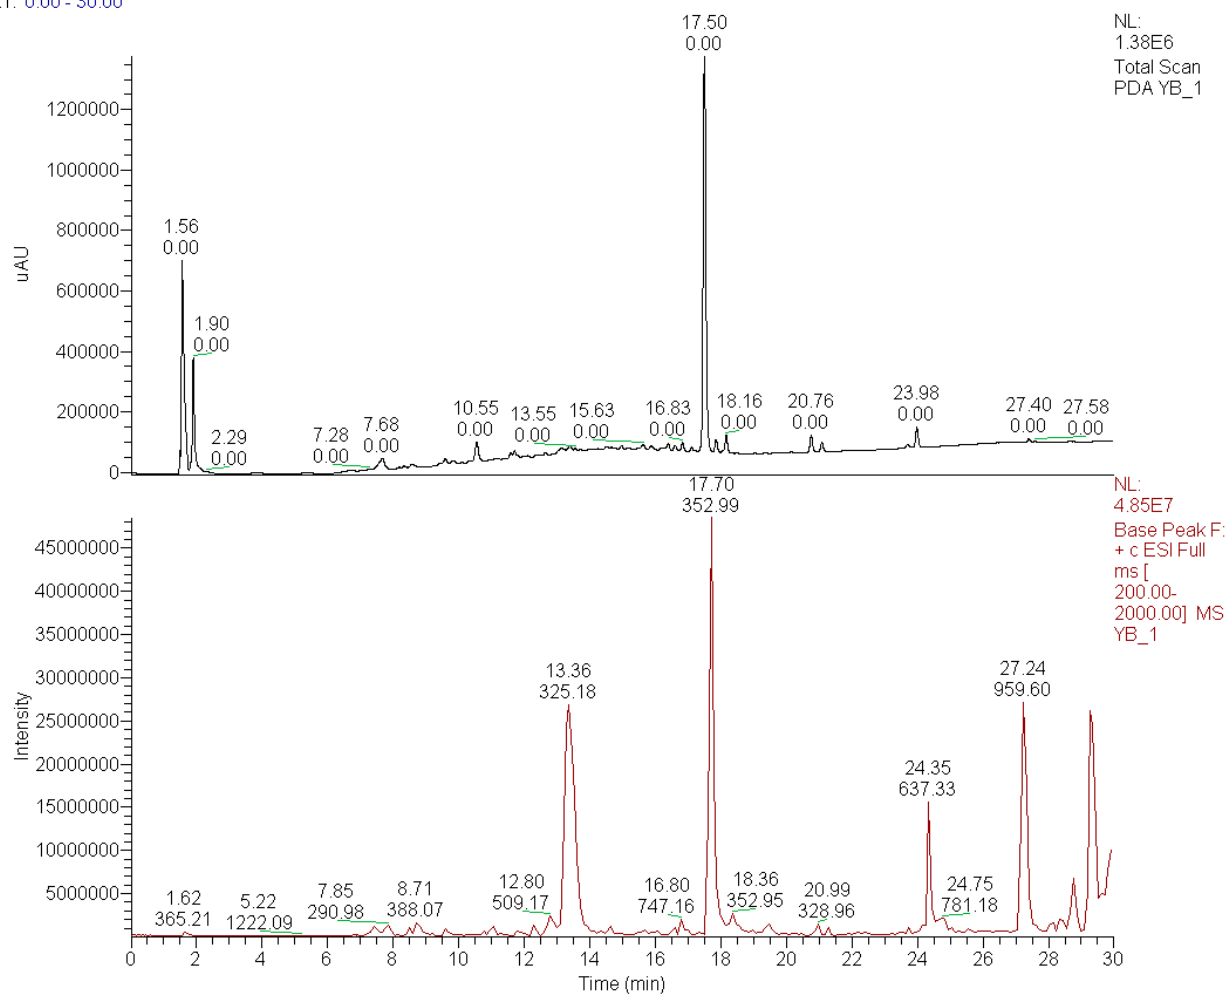

Figure S1. TIC chromatogram for the extract of the callus

RT: 0.00 - 30.05

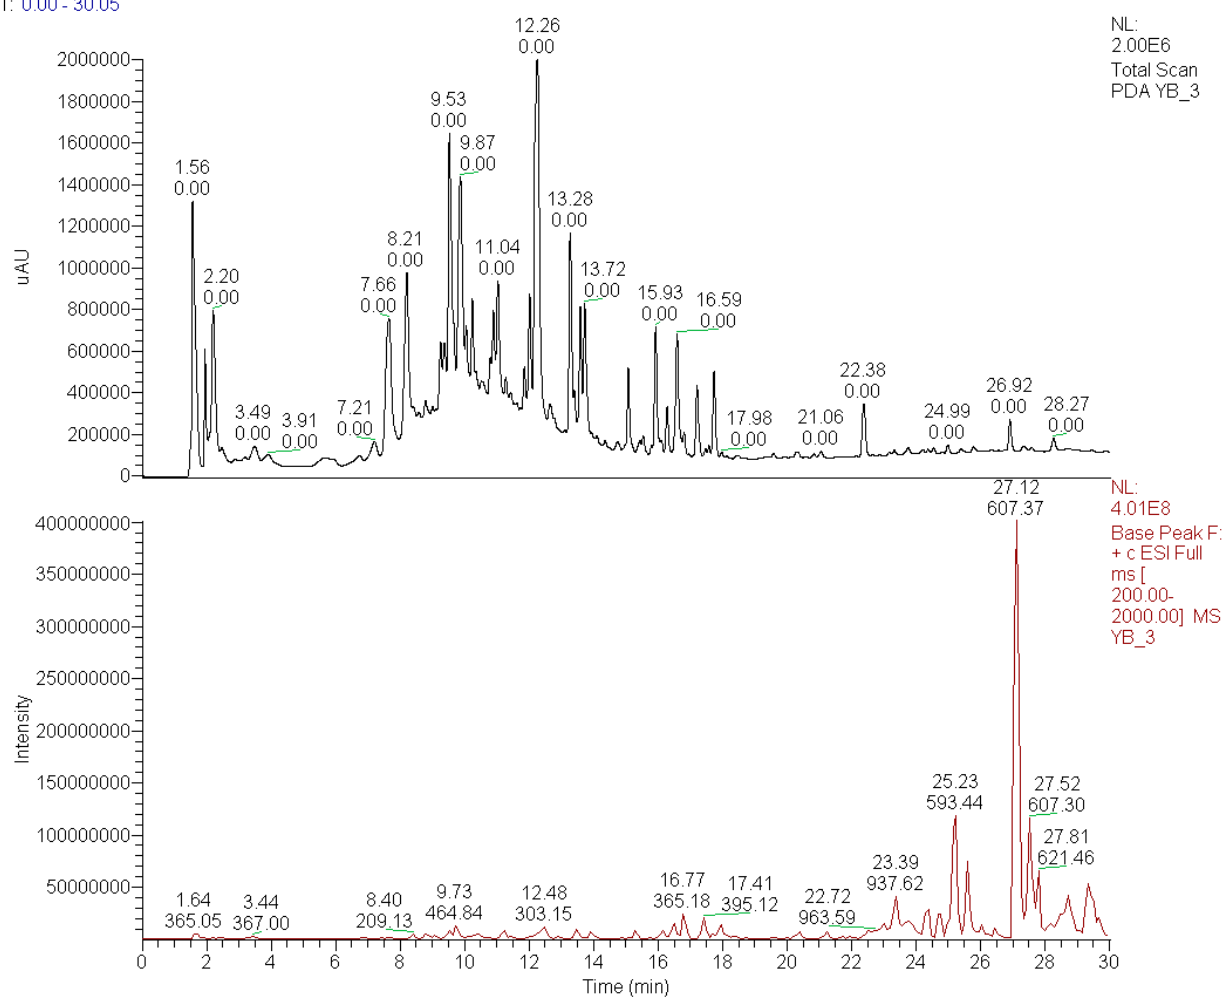

Figure S2. TIC chromatogram for the extract of the cell suspension

RT: 0.00 - 30.02

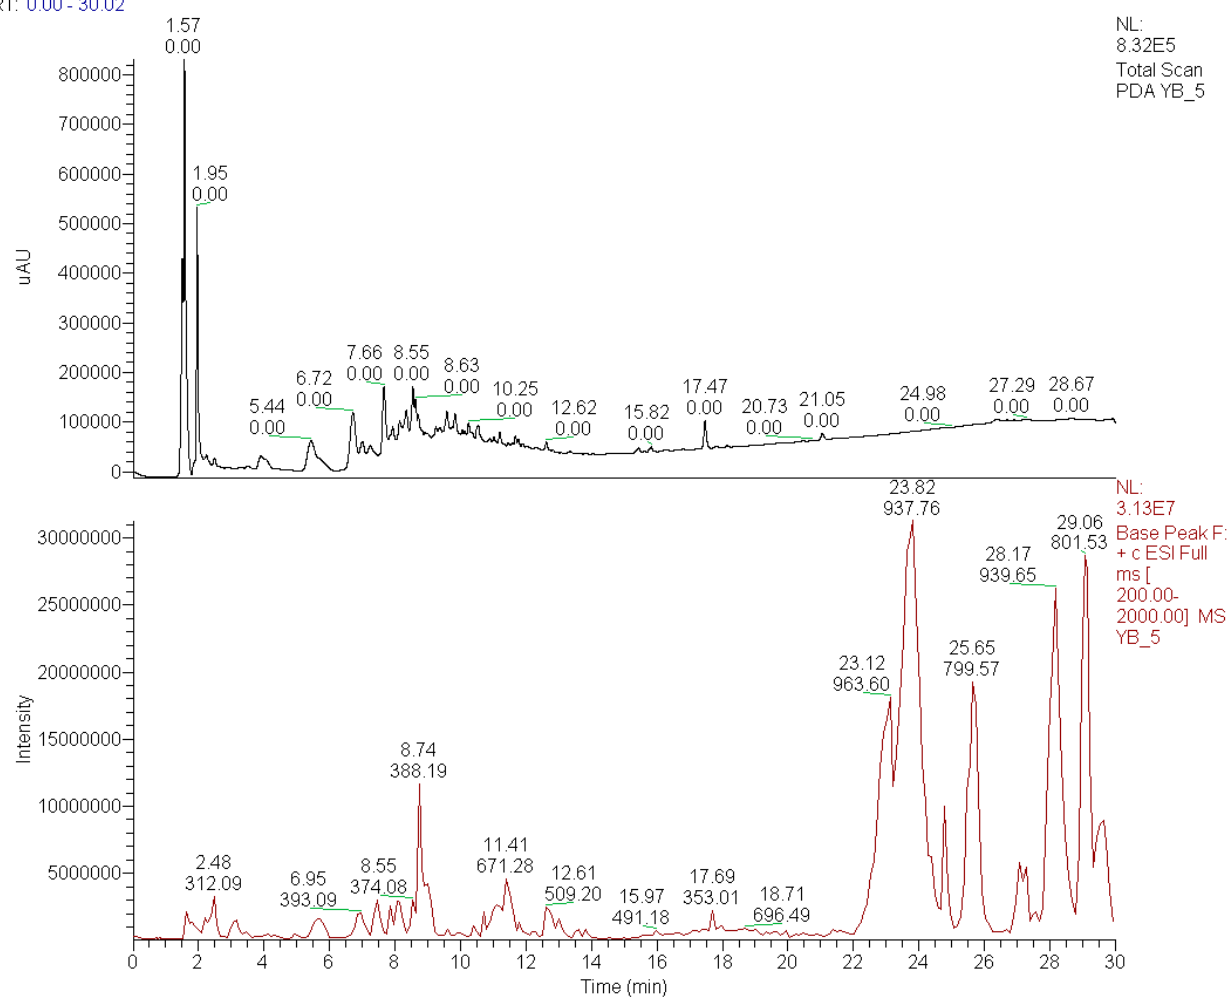

Figure S3. TIC chromatogram for the extract of the leaves

RT: 0.00 - 30.08

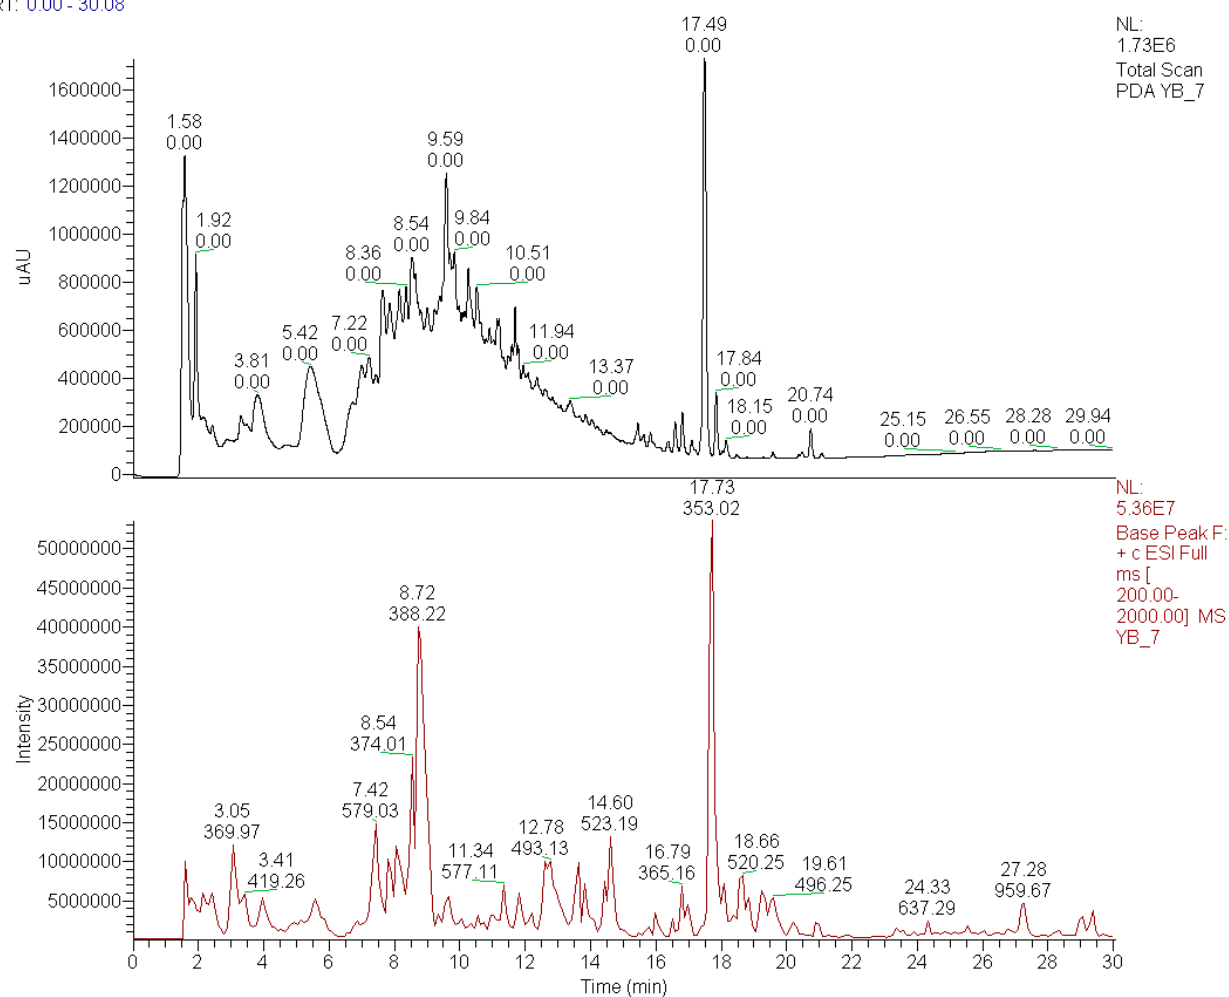

Figure S4. TIC chromatogram for the extract of the seed
